# Supplementary material
Source: publisher site journal article supplement (https://www.dovepress.com/article/367398)
Supplement: Supplementary file 1 [file get_supplementary_file.php]

**Supplementary materials**

**Supplementary Table 1. Traditional antimicrobial susceptibility test of 11 CRKP and 13 CRAB isolates in ICU-1.**

| **Isolate Number** | **Amikacin** | **Ceftazidime** | **Cefepime** | **Aztreonam** | **Piperacillin-tazobactam** | **Cefperazone-Sulbactam** | **Imipenem** | **Meropenem** | **Ciprofloxacin** | **Levofloxacin** | **Sulfamethoxazole** | **Doxycycline** | **Tigecycline** | **Colistin E** |
| --- | --- | --- | --- | --- | --- | --- | --- | --- | --- | --- | --- | --- | --- | --- |
| kp1 | ≥64 | ≥64 | ≥32 | ≥64 | ≥128/4 | ≥64 | ≥16 | ≥16 | ≥4 | ≥8 | ≥320 | ≥16 | / | ≤ 0.5 |
| kp2 | ≥64 | ≥64 | ≥32 | ≥64 | ≥128/4 | ≥64 | ≥16 | ≥16 | ≥4 | ≥8 | ≥320 | ≥16 | / | ≤ 0.5 |
| kp4 | ≥64 | ≥64 | ≥32 | ≥64 | ≥128/4 | ≥64 | ≥16 | ≥16 | ≥4 | ≥8 | ≥320 | ≥16 | / | ≤ 0.5 |
| kp5 | ≥64 | ≥64 | ≥32 | ≥64 | ≥128/4 | ≥64 | ≥16 | ≥16 | 1 | 4 | ≥320 | 4 | 2 | ≤ 0.5 |
| kp6 | ≥64 | ≥64 | ≥32 | ≥64 | ≥128/4 | ≥64 | ≥16 | ≥16 | 2 | 4 | ≥320 | 8 | 2 | ≤ 0.5 |
| kp7 | ≥64 | ≥64 | ≥32 | ≥64 | ≥128/4 | ≥64 | ≥16 | ≥16 | 2 | 4 | ≥320 | ≥16 | 4 | ≤ 0.5 |
| kp8 | ≥64 | ≥64 | ≥32 | ≥64 | ≥128/4 | ≥64 | ≥16 | ≥16 | ≥4 | ≥8 | ≥320 | ≥16 | / | ≤ 0.5 |
| kp9 | 6 | ≥64 | ≥32 | ≥64 | ≥128/4 | ≥64 | ≥16 | ≥16 | ≥4 | ≥8 | ≥320 | ≥16 | / | ≤ 0.5 |
| kp10 | 6 | ≥64 | 16 | ≥64 | ≥128/4 | 16 | ≥16 | ≥16 | ≥4 | ≥8 | ≥320 | 2 | 4 | ≤ 0.5 |
| kp11 | ≥64 | ≥64 | ≥32 | ≥64 | ≥128/4 | ≥64 | ≥16 | ≥16 | 1 | 4 | ≥320 | 4 | 2 | ≤ 0.5 |
| kp12 | ≥64 | ≥64 | ≥32 | ≥64 | ≥128/4 | ≥64 | ≥16 | ≥16 | ≥4 | ≥8 | ≥320 | ≥16 | / | ≤ 0.5 |
| ab1 | 6 | ≥64 | ≥32 | ≥64 | ≥128/4 | ≥64 | ≥16 | ≥16 | ≥4 | 4 | ≤20 | ≥16 | 1 | ≤ 0.5 |
| ab2 | 6 | ≥64 | ≥32 | ≥64 | ≥128/4 | 16 | ≥16 | ≥16 | ≥4 | ≥8 | ≥320 | 2 | 4 | ≤ 0.5 |
| ab3 | 6 | ≥64 | ≥32 | ≥64 | ≥128/4 | 16 | ≥16 | ≥16 | ≥4 | ≥8 | ≥320 | 2 | 4 | ≤ 0.5 |
| ab4 | 19 | ≥64 | ≥32 | ≥64 | ≥128/4 | ≥64 | ≥16 | ≥16 | ≥4 | ≥8 | ≥320 | ≥16 | 4 | ≤ 0.5 |
| ab5 | / | ≥64 | ≥32 | ≥64 | ≥128/4 | 16 | ≥16 | ≥16 | ≥4 | ≥8 | ≥320 | 2 | 4 | ≤ 0.5 |
| ab6 | 6 | ≥64 | ≥32 | ≥64 | ≥128/4 | ≥64 | ≥16 | ≥16 | ≥4 | 4 | ≥320 | ≥16 | ≤ 0.5 | ≤ 0.5 |
| ab8 | 6 | ≥64 | ≥32 | ≥64 | ≥128/4 | 16 | ≥16 | ≥16 | ≥4 | ≥8 | ≥320 | 2 | 4 | ≤ 0.5 |
| ab9 | 6 | ≥64 | ≥32 | ≥64 | ≥128/4 | ≥64 | ≥16 | ≥16 | ≥4 | ≥8 | ≤20 | ≥16 | 2 | ≤ 0.5 |
| ab 10 | 6 | ≥64 | ≥32 | ≥64 | ≥128/4 | ≥64 | ≥16 | ≥16 | ≥4 | 4 | ≥320 | ≥16 | 2 | ≤ 0.5 |
| ab 11 | 6 | ≥64 | ≥32 | ≥64 | ≥128/4 | 16 | ≥16 | ≥16 | ≥4 | ≥8 | ≥320 | 1 | 4 | ≤ 0.5 |
| ab 12 | 6 | ≥64 | 16 | ≥64 | ≥128/4 | 32 | ≥16 | ≥16 | ≥4 | 4 | ≥320 | ≥16 | ≤ 0.5 | ≤ 0.5 |
| ab 13 | 6 | ≥64 | ≥32 | ≥64 | ≥128/4 | 16 | ≥16 | ≥16 | ≥4 | ≥8 | ≥320 | ≥16 | 1 | ≤ 0.5 |
| ab14 | 6 | ≥64 | ≥32 | ≥64 | ≥128/5 | ≥64 | ≥16 | ≥16 | ≥4 | ≥8 | ≥320 | ≥16 | 4 | ≤ 0.6 |

**Supplementary Table 2. Traditional antimicrobial susceptibility test of 13 CRKP isolates in ICU-2.**

| Isolate Number | Source | Amikacin | Ceftazidime | Cefepime | Piperacillin-tazobactam | Cefperazone-Sulbactam | Imipenem | | Meropenem | Ciprofloxacin | Levofloxacin | | Sulfamethoxazole | Doxycycline | Tigecycline | Colistin E | |
| --- | --- | --- | --- | --- | --- | --- | --- | --- | --- | --- | --- | --- | --- | --- | --- | --- | --- |
| 909 | sputum | ≥64 | ≥64 | ≥32 | ≥128 | ≥64 | ≥16 | | ≥16 | ≥ 4 | 4 | | ≥320 | ≥16 | ≥ 8 | ≤0.5 | |
| 902 | sputum | ≥64 | ≥64 | ≥32 | ≥128 | ≥64 | ≥16 | | ≥16 | ≥ 4 | 4 | | ≥320 | ≥16 | / | ≤0.5 | |
| 916 | sputum | ≥64 | ≥64 | ≥32 | ≥128 | ≥64 | ≥16 | | ≥16 | ≥ 4 | 4 | | ≥320 | ≥16 | / | ≤0.5 | |
| 920 | sputum | ≥64 | ≥64 | ≥32 | ≥128 | ≥64 | ≥16 | | ≥16 | ≥ 4 | 4 | | ≥320 | ≥16 | ≥ 8 | ≤0.5 | |
| 938 | Rectal Swab | ≥64 | ≥64 | ≥32 | ≥128 | ≥64 | ≥16 | | ≥16 | ≥ 4 | 4 | | ≥320 | ≥16 | ≥ 8 | ≤0.5 | |
| 932 | sputum | ≥64 | ≥64 | ≥32 | ≥128 | ≥64 | ≥16 | | ≥16 | ≥ 4 | 4 | | ≥320 | ≥16 | ≥ 8 | ≤0.5 | |
| 937 | Rectal Swab | ≥64 | ≥64 | ≥32 | ≥128 | ≥64 | ≥16 | | ≥16 | ≥ 4 | 4 | | ≥320 | ≥16 | ≥ 8 | ≤0.5 | |
| 873 | Rectal Swab | / | / | / | / | / | / | / | | / | / | | / | / | / | / | |
| 948 | CSF | ≥64 | ≥64 | ≥32 | ≥128 | ≥64 | ≥16 | ≥16 | | ≥ 4 | 4 | | ≥320 | ≥16 | / | ≤0.5 | |
| 901 | CSF | ≥64 | ≥64 | ≥32 | ≥128 | ≥64 | ≥16 | ≥16 | | ≥ 4 | 4 | | ≥320 | ≥16 | ≥ 8 | ≤0.5 | |
| 942 | sputum | ≥64 | ≥64 | ≥32 | ≥128 | ≥64 | ≥16 | ≥16 | | ≥ 4 | 4 | | ≥320 | ≥16 | ≥ 8 | ≤0.5 | |
| 945 | sputum | ≥64 | ≥64 | ≥32 | ≥128 | ≥64 | ≥16 | ≥16 | | ≥ 4 | 4 | | ≥320 | ≥16 | / | ≤0.5 | |
| 963 | sputum | ≥64 | ≥64 | ≥32 | ≥128 | ≥64 | ≥16 | ≥16 | | ≥ 4 | | 4 | ≥320 | ≥16 | / | ≤0.5 |
